# 1 3D-printed Planktonic Observational Setup and 2 Analysis Pipeline TrackmateTaxis

3 Clemens C. Döring<sup>1</sup> & Harald Hausen<sup>1\*</sup>

4 <sup>1</sup>Sars International Centre for Marine Molecular Biology, University of Bergen, Norway

5 \*Corresponding Author (Harald.Hausen@uib.no)

## 6 Abstract

7 Planktonic organisms are a cornerstone of marine ecosystems. They vary significantly in size and have  
8 a repertoire of behaviors to aid them to survive and navigate their three-dimensional environment.  
9 One of the most important cues is light. A variety of setups were used to study the swimming behavior  
10 of specific organisms, but broader and comparative investigations need more versatile solutions. With  
11 the help of 3D printing, we designed and constructed a modular and flexible behavioral observation  
12 setup that enables recordings of animals down to 50 $\mu$ m or up to a few centimeters. A video analysis  
13 pipeline using ImageJ and python allows a quick, automated, and robust tracking solution, capable of  
14 processing many videos automatically. A modular light path allows the addition of filters or use of pulse  
15 width modulation to equalize photon emission of LEDs or additional LEDs to mix different wavelengths.  
16 Optionally, a spectrometer can be installed to enable live monitoring of a stimulus. We tested the setup  
17 with two phototactic marine planktonic larvae. First, we investigated the spectral sensitivity of the 7-  
18 day old larvae of the polychaete *Malacoceros fuliginosus* and second, the behavior of the 200 $\mu$ m  
19 spherical bryozoan coronated larvae of *Tricellaria inopinata* to ultraviolet light coming from the bottom  
20 of the vessel. The setup and pipeline were able to record and analyze hundreds of animals  
21 simultaneously. We present an inexpensive, modular, and flexible setup to study planktonic behavior  
22 of a variety of sizes.

23 **Keywords:** Plankton, Larvae, Behavior, Phototaxis, 3D printing, behavioral assay, analysis pipeline,  
24 animal tracking

## 25 Introduction

26 Zooplankton is a major factor in carbon and nitrogen cycling within oceans, and plankton migration is  
27 influencing movements of other trophic levels in turn (Hays, 2003). Chemical cues, gravity, but most  
28 importantly, light are the primary stimuli that aid zooplankton for orientation and navigation within  
29 their three-dimensional environment. Light plays an essential role during crucial events of planktonic  
30 life stages of numerous animals like dispersal behavior or during the transition from the pelagic larval  
31 phase to the adult benthic, often sessile stage.

32 Additionally, the daily vertical migration of zooplankton is primarily controlled by light (Thorson, 1964).  
33 Respective directional movements towards and away from light (phototactic steering) are well  
34 documented for many animal larvae like sponge larvae (Elliott et al., 2004), Coral (Piraino et al., 2011),  
35 Nauplius (Swift & Forward, 1980), annelid and mollusk trochophore (Jékely et al., 2008; Marsden,  
36 1986; Miller & Hadfield, 1986) but also adult stages like copepods (Tranter et al., 1981), Cladoceri  
37 (Ringelberg, 1964) and *Daphnia* (Effertz & von Elert, 2014). Also, light-dependent swimming behavior  
38 can be irrelevant to the direction of the stimulus like the UV avoidance reaction of *Platynereis dumerilii*  
39 larvae (Veraszto et al., 2018), *Drosophila melanogaster* (Xiang et al., 2010), *Salmo salar* (Fernö et al.,  
40 1995) or the shrimp *Mysis relicta* (Gal et al., 1999). However, for the vast majority of planktonic  
41 animals, many essential aspects are poorly understood, such as the specific reactions to different  
42 wavelengths, the switching between positive and negative phototaxis, the influence of chemical cues,  
43 or other factors on light-dependent reactions and the changes of all of this throughout development.  
44 A better characterization of light-dependent movements of planktonic organisms is undoubtedly  
45 relevant for a deeper understanding of planktonic ecology. Still, it will also affect research on the  
46 behavioral and sensory biology of planktonic organisms. For a few animals, specialized setups and

47 pipelines for assessing and analyzing the behavior have been developed. In this study, we present an  
48 affordable, modular setup for quantitative analysis of the swimming behavior of many different kinds  
49 of planktonic organisms. The main focus is on light-dependent behavior, but the setup can easily be  
50 modified for studies on chemo-sensation or gravitaxis.

51 Assessing the impact of light on the planktonic movement within the water column consists of two  
52 separate challenges. The first is to observe the animals in near-natural conditions while still being able  
53 to obtain quantifiable, reproducible data about swimming behavior. The second challenge deals with  
54 quantification and processing the generated data.

55 1) Observation: Planktonic animals are diverse and range from only a few micrometers up to several  
56 meters. Our interest lay with the micro- up to mesozooplankton. The setup was supposed to be able  
57 to record animals from only 100 $\mu$ m up to a few millimeters. Most published setups for behavioral  
58 experiments are custom constructions for a specific organism and would be limited in its flexibility. A  
59 huge variety of installations for behavioral observations exists for the most common model organisms,  
60 but for marine organisms, the selection is limited. For fish, varying size constructions exist to observe  
61 navigation in rivers (Rodríguez et al., 2015) or tracking animals in 3D with the help of sensor bars from  
62 Microsoft Kinect (Saberioon & Cisar, 2016). For even smaller marine animals like plankton, some setups  
63 are capable of observing animals in situ with the help of a remotely operated vehicle (Gallager et al.,  
64 2004) or for simulating the mangrove environment of the boxed jellyfish *Tripedialia cystophora* (Garm  
65 et al., 2007; Oskarsson et al., 2015; Petie et al., 2011). Even smaller zooplankton of a few millimeters  
66 and smaller setups have been used to analyze the swimming behavior of trochophore larvae of  
67 *Platynereis dumerilii* under various light conditions (Veraszto et al., 2018) or to observe escape (Fields  
68 & Yen, 1997) or mating (Kiørboe, 2007) behavior of copepods. The often sophisticated setups used in  
69 these and other studies are often not described in such detail that they can quickly be rebuilt or are  
70 not flexible enough to allow usage with different animals or varying stimuli. Our focus was to design a

71 basic setup that is easy to build, allows precise adjustment of various light conditions, and which can  
72 be easily modified and extended by adding further modules, e.g., for chemical stimulation.

73 2) Quantification: Behavioral assays generate large quantities of data that are not feasible to process  
74 manually. For this purpose, an extensive selection of software exists with varying degrees of  
75 complexity or specialization. Often, tracking software is specially designed for specific animals like  
76 MouseMove (Samson et al., 2015), EthoWatcher (Crispim Junior et al., 2012) for mice, Ctrax (Branson  
77 et al., 2009) for *Drosophila* or a plethora of trackers for *Caenorhabditis elegans* (for an overview see  
78 Hart, 2006). Others focus on adding further functionality; in particular, the problem occurring when  
79 tracked animals cross paths has been addressed with varying degrees of success (toxtrac (Rodriguez et  
80 al., 2017), idtracker (Pérez-Escudero et al., 2014)). While these trackers allow tracking of individual  
81 animals, it is still recommended to keep animal numbers low to avoid too many crossing events to  
82 happen at the same time.

83 Aiming higher experimental throughput, we provide a simple, automatic, and robust pipeline to assess  
84 directional swimming behavior from recordings of high numbers of animals, applicable to various kinds  
85 of swimming trajectories and organism size. All steps run within graphical user interfaces, from video  
86 preprocessing to the generation of plots and statistical output. It makes use of the particle tracker  
87 Trackmate within Fiji, but tolerates high amounts of path splitting and joining events.

88 Planktonic behavior within the water column is complex, and different stimuli influence such behavior.  
89 We describe an experimental setup to investigate the light-dependent swimming behavior of a wide  
90 variety of zooplankton under freely configurable light conditions. By utilizing 3D printing, we  
91 demonstrate a straightforward and affordable way to add functionality to this setup for more specific  
92 investigations and studies of other stimuli. Furthermore, we supply an easy software pipeline for data  
93 analysis.

94

## 95 Materials and Method

96 We designed all the parts for 3D printing with FreeCad (<https://www.freecadweb.org/>) and printed in  
97 'Black Strong & Flexible' plastic by shapeways.com. All model files are available in various file formats.  
98 For the backlight illumination, we utilized an IR backlight (Polytec, Waldbronn, Germany, SAR7 0605)  
99 and its controller (Polytec, Waldbronn, Germany PAD2 2135/1) to adjust illumination intensity finely.  
100 The camera used in our setup is a monochromatic CMOS USB3 Camera (Imaging Source, Bremen,  
101 Germany, DMK 23UX236) together with a lens (Ricoh, Tokyo, Japan, FL-CC1614-2M). Optionally, we  
102 mounted a near-infrared longpass filter (Reichmann Feinoptik, Brokdorf, Germany, RG610,  
103 03.1.1.1.0702) in front of the camera, to avoid light scattering by the illuminating stimuli during  
104 phototaxis experiments. To mix different wavelengths of light, we used dichroic filters, beamsplitters,  
105 and mirrors from Omega Optical (Brattleboro, USA, 430DCLP, 505DRLP, 565DRLPXR, 50/50BS) in  
106 connection with LEDs from Pur-led (Udenheim, Germany, for full details, see "Building Instructions"  
107 in supporting information). The LEDs were either powered by a standard laboratory power supply  
108 (Tenma, Osaka, Japan, 72-10505) or with an Arduino Uno Rev3 (Arduino.cc) microcontroller and  
109 appropriate resistors of the E24 series. To be able to fine-tune light intensity, we utilized neutral  
110 density filters from Reichmann Feinoptik or pulse width modulation. We used a spectrometer (B&W  
111 TEK, Newark, USA, SpectraRad, BSR112E-VIS/NIR) to monitor the irradiance of the emitted light.  
112 Additionally, we also measure LEDs emitted spectrum with Ramses Spectrometer (TriOS, Rastede,  
113 Germany, 40S121010). To avoid any light contamination, we encased the whole setup in a simple  
114 wooden frame that was covered by a 0.12mm thick blackout fabric (Thorlabs, Newton, USA, BK5).  
115 Scripting was done in Fiji version java6 20170530 and python version 2.7 with Anaconda2 version 4.0.0  
116 using spyder2. The script is also available in python 3.8

## 117 Animals

118 We collected the bryozoan *Tricellaria inopinata* colonies in Brest, France. Aquariums in light-tight  
119 boxes housed the adult colonies at a constant 18° while maintaining a strict 12hr day/night cycle. Light



**Figure 1.** Overview of the Setup. A. The setup consists of a camera with an infrared longpass filter (IR LP) mounted on the camera tower, which can be adjusted in height (blue arrow), rotated (red circle), and variable working distance (green arrow). The camera observes a cuvette (Cu) that can be mounted at varies heights (Blue curved arrows) and receives backlight infrared illumination (BL). As a light stimulus, various light paths can be constructed that are mounted either above or below the cuvette. B. A very simple light path can be built with few pieces that allow an adjustable height of the LED.

BL: backlight, Cu: cuvette, CuH: cuvette holder, LG: lower guide, UG: upper guide, CG: camera guide, CT: camera tower, IR LP: infrared longpass filter, L: LED cube, 30C: 30mm connector, SL: slider, B: brass inlet, T: thumbscrew

132 and opting for selective laser sintering (SLS) printing due to its rougher surface finish and that this  
133 method makes the use of support structures during the print (scaffolding) unnecessary.

134

135 The behavioral setup consists of a camera mounted on a slider within a track (Fig 1 A). All main parts,  
136 except for the cuvettes, can be printed from the 3D models provided in the supporting information.  
137 Printing can be performed on locally available 3D printers or by commercial suppliers of 3D printing  
138 services. Detailed instructions for the final assembly are provided in the supporting information  
139 “Detailed Building Instructions”. Camera height and angle are adjustable by simple thumbscrews. At  
140 the end of the track is the fixture to hold a cuvette. The cuvette holder can be mounted in 7 different  
141 heights and is capable of holding a cuvette of varying depth up to approximately 18cm high, 23cm  
142 wide. Above and below the cuvette holder are guided tracks to hold a light path or other fixtures in  
143 place. Positioned behind the cuvette is an IR backlight illuminating the observable area. The camera  
144 track can be constructed to be either 23, 46, or 69cm long and allows movement of the camera closer  
145 or further away from the observable area depending on cuvette size and animal size.

146 [About Camera, Animals, and Cuvettes](#)

147 Essential parameters for any setup depend on the animal to be studied. Most important are  
148 appropriate dimensions of the cuvette allowing for near-natural swimming behavior. In turn, camera  
149 optics have to match cuvette dimensions in x, y, and z to achieve sharp images from anywhere within

150 the cuvette, and camera-resolution has to be high enough that individual organisms can be tracked.  
151 With relatively simple calculations, it is possible to determine the desired characteristics and physical  
152 limits of any given camera, associated lens, and cuvette based on the animals' size.

### 153 [Animal size consideration](#)

154 When it comes to determining an optimal camera and lens, its magnification factor is, of course, the  
155 essential property considering that most planktonic animals are microscopic. The property that  
156 concerns us the most is how many pixels our animal will occupy on any given chip.

157 This height of the object under investigation ( $h^o$ ) relates according to basic optic laws to focal length  
158 ( $f$ ), distance to the object ( $d$ ) and the size of each pixel on the sensor ( $h^p$ ):

$$159 \quad h^o = \frac{h^p (d-f)}{f}$$

160 The camera we installed has a CMOS chip of 1/2.8 inches and a pixel size of 2.8  $\mu\text{m}$ . The lens we used  
161 has a focal length of 16mm and a minimum working distance of 18 cm. Since our setup positions the  
162 camera on a continuous slider, the camera position can vary up to a maximal distance of 60cm. If the  
163 camera position is at a minimum working distance to the cuvette, each pixel on the camera will picture  
164 28  $\mu\text{m}$ . In its furthest configuration, each pixel translates to 100  $\mu\text{m}$ . Theoretically, this setup is capable  
165 of recording animals anywhere between 28 and 100  $\mu\text{m}$  as its lower limit. However, we do not  
166 recommend using a resolution of one pixel per animal, as this can cause a lot of noise later when  
167 tracking the animals. Even minute changes of only one pixel will cause the tracker to identify false-  
168 positives. Considering that each animal should at least occupy 2x2 pixels, it would limit our camera-  
169 setup to animals roughly 50 $\mu\text{m}$  in size. This value can easily be adjusted by using cameras with other  
170 pixel sizes or different lenses.

### 171 [Depth of field](#)

172 Another critical parameter of the camera optics for obtaining sharp images is the depth of field (DOF).  
173 It relates to working distance ( $d$ ), the circle of confusion ( $c$ ), the f-Number ( $N$ ), and the focal length ( $f$ ):



174 
$$DOF = \frac{d}{1 \pm c \times N \times \left(\frac{d \times f}{f^2}\right)}$$

175 The circle of confusion in the case of a digital camera is the pixel size of the sensor, which is 2.8  $\mu\text{m}$  in  
176 our case. As the formula implies, the focal length of the lens influences our depth of field enormously.  
177 This should be taken into account when deciding on the lens to be used. For our camera and lens, the  
178 depth of field is between 2.5mm and 30mm with an aperture of 4. Further closing the aperture will  
179 increase the depth of field slightly but requires more illumination. While these values reflect the  
180 theoretical limits of the depth of field, other factors influence the effective, workable volume. Image  
181 processing and the capabilities of the tracker can compensate for recordings, which are slightly out of  
182 focus. For our setup, it was possible to effectively track animals in a volume up to four times deeper  
183 than the calculated depth of field.

#### 184 [Observable area](#)

185 Finally, the visible area changes with the position of the camera and limits the size of any cuvette used.  
186 The observable area is directly dependent on the camera chip resolution in pixels ( $w^i \times h^i$ ), the object  
187 height that each pixel is capable of recording ( $h^p$ ) and the working distance ( $d$ ):

188 
$$\text{observable area } x = w^i \times \left(\frac{h^p (d - f)}{f}\right)$$

189 
$$\text{observable area } y = h^i \times \left(\frac{h^p (d - f)}{f}\right)$$

190 The camera we used has a full HD chip resolution of 1920x1200 pixel. In the closest possible  
191 configuration of our setup, the observable area is 5.5cm x 3.4cm, while the furthest possible position  
192 is capable of recording an image of 21.6cm x 13.5cm in size.

193

194 [Lightpath](#)

195 [Light source](#)

196 Several options exist for generating light of a defined wavelength and intensity. Monochromators are  
197 convenient for narrowing down the spectrum of a light source to a narrow band at the desired  
198 wavelength. However, they are costly investments and provide only one band at a time. Additionally,  
199 the emitted energy (irradiation) may vary across the spectrum depending on the spectral  
200 characteristics of the used light source. Commercial LED light for microscopic purposes is an attractive  
201 alternative, but they are likewise costly and may not offer the wavelengths desired. Simple LED light  
202 bulbs are cheap and available in many colors and intensities. Thus, we decided to use a LED-based light  
203 path, which allows for illuminating the samples with light composed of several wavelengths and at  
204 desired intensities.

205 Our setup is modular and allows many different configurations. A very simple light path could use a  
206 single LED as a light source. To provide standardized light conditions, this rests inside an LED holding  
207 cube connected to a 12mm wide tube that is fixed to a slider either at the bottom or top guide tracks  
208 (Fig 1 B). A more complex light path could consist of multiple LEDs that merge with the help of dichroic  
209 mirrors (Fig 2, supporting information “Detailed Building Instructions”).

## Light Mixer

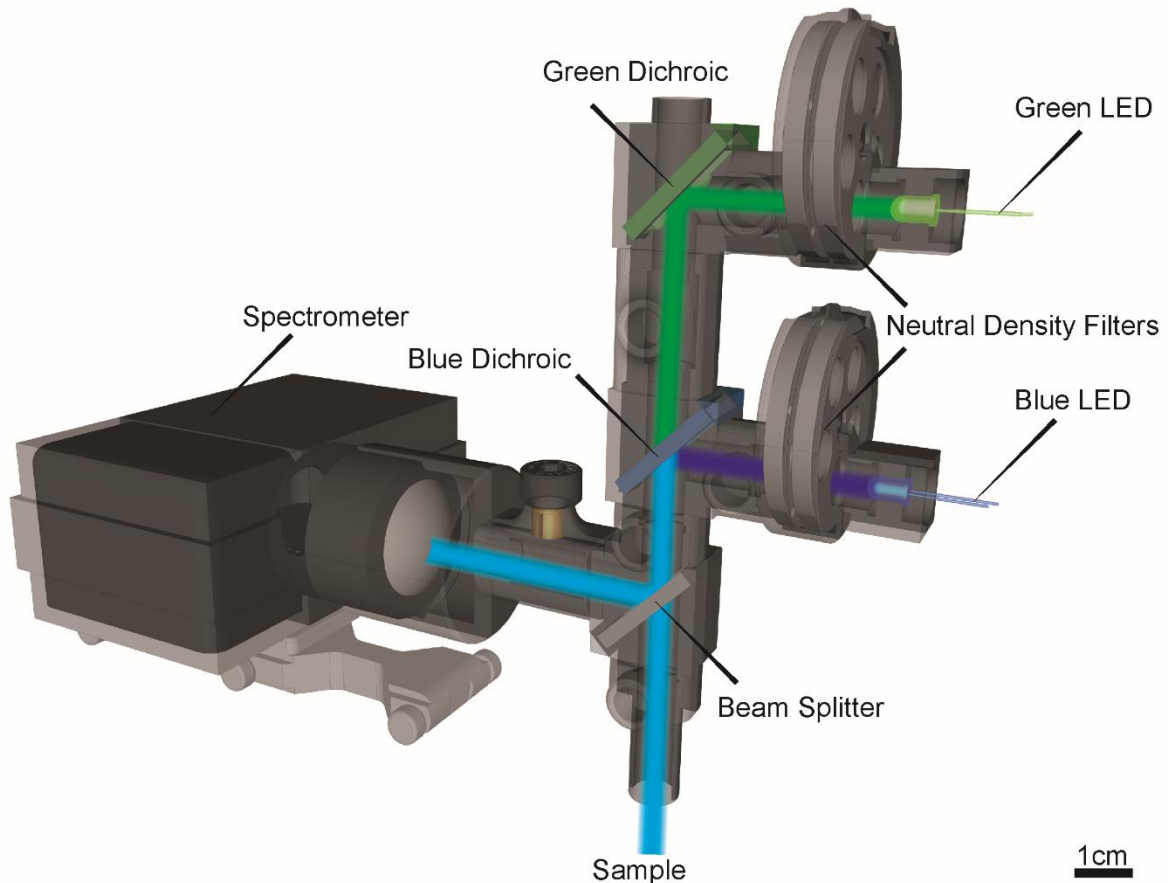

**Figure 2.** The light mixer allows the mixing of multiple LEDs (shown here with two) that can all be individually regulated with neutral density filters inside of the filter revolver and simultaneously measuring irradiance with a spectrometer.

210

### 211 Controlling photon emission

212 For adjustment of overall light intensity and that of specific wavelengths in mixed light conditions, the  
213 output of each LED has to be controlled. A prevalent option to regulate the intensity of LEDs is to flicker  
214 them at high frequencies by pulse-width modulation (PWM) of the voltage supplied. PWM is a  
215 convenient approach to adjust the average irradiance of LEDs over a specific range, which depends on  
216 the electronic characteristics of the controller, the LEDs, and the flicker frequency. When dimming with  
217 PWM, it is desired to have a high contrast ratio, which can be achieved with low-frequency PWM.  
218 However, the flicker fusion frequency of the eyes of different species varies and is only known for a  
219 few species (Inger et al., 2014). The duty cycle for PWM thus should be chosen that is unnoticeable for  
220 the suspects' eyes. PWM can be constructed with inexpensive microcontrollers and resistors. We used

221 an Arduino microcontroller following the instructions of Muhammad Aqib  
222 (<https://create.arduino.cc/projecthub/muhammad-aqib/arduino-pwm-tutorial-ae9d71>) to build a  
223 simple PWM controller. Depending on the operating voltage of the LEDs to use specific resistors need  
224 to be used.

225 Alternatively, we opted for a combination of filter-based dimming and analogous dimming by adjusting  
226 the voltage applied to the LEDs. This way, the drawback of analogous LED dimming (changes in the  
227 spectral characteristics) can be kept small. Neutral density filters reduce the incoming light regardless  
228 of spectral characteristics evenly by a certain percentage. We constructed a 3D printable dual filter  
229 revolver that can hold eight different neutral density filters (Fig 3, supporting information “Detailed  
230 Building Instructions”). Combining neutral density filters and altering voltages applied to the LED  
231 allowed us to adjust the emitted photons

232 between 100 to 0.00001% continuously regardless of wavelength. When controlling LEDs via the  
233 applied voltage, it is of importance to monitor the emitted spectrum of each LED under these  
234 conditions since different voltages can alter their emission wavelength.

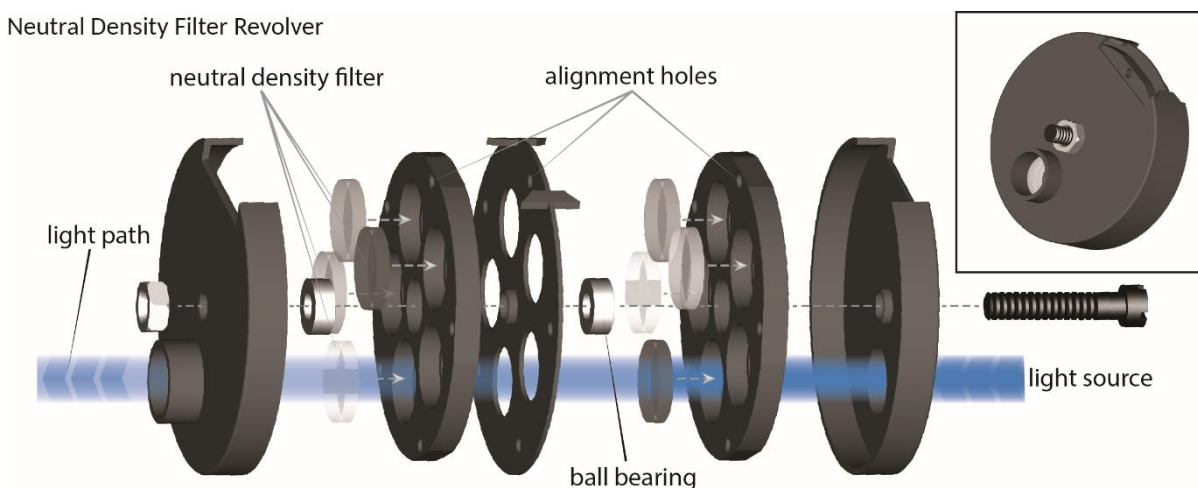

**Figure 3.** Modulating light. Neutral density filter revolver (NDR) allows to quickly changing different neutral density filters into the light path to influence the emitted light by the LED. The filters sit inside of two revolving wheels, each capable of holding up to 5 filters each. Alignments guarantee that the light path will not be partially blocked by intermediate positions of the filter.

235 Combining PWM and the described neutral density filter revolvers, finally, allows for the most accurate  
236 regulation of photon emission across broad ranges of light intensities.

### 237 Characterization of the LEDs

238 We recommend assessing the emitted spectrum of each LED before usage since the respective values  
239 given by the producers are not always accurate. For this purpose, we designed an adapter with which  
240 a LED light bulb can be put in a defined distance to a spectrometer. This way, it is also possible to  
241 measure the irradiance, which is a wavelength-independent quantity of light intensity. In a second  
242 step, both the spectrum and the intensity can be assessed for different applied voltages. We provide  
243 a simple script to convert irradiance into photon count (number of emitted photons), which is the most  
244 significant quantity for light intensity in photobiological experiments. By combining filter-based and  
245 analogous, voltage based dimming, the number of emitted photons can be adjusted to similar levels  
246 for different LEDs (Fig 4 A).

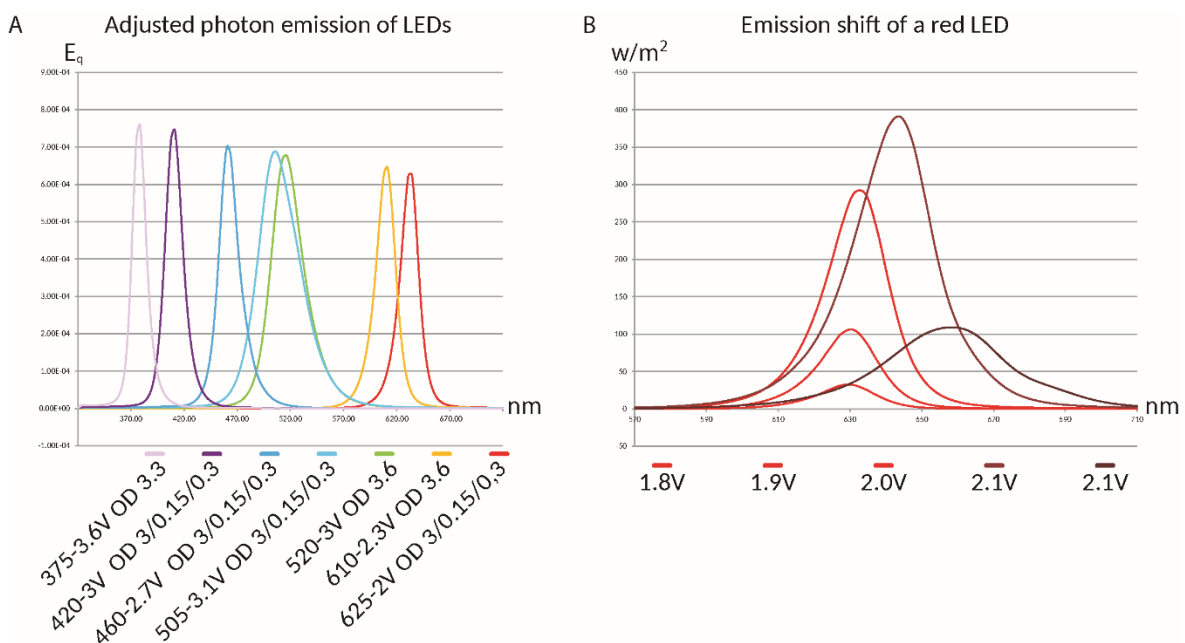

**Figure 4. A.** Using LEDs in combination with varying voltage and neutral density filters (optical density: OD) allows the regulation of photon emission to comparable levels. **B.** Special care should be given to regulating LEDs with voltages above their specification, as this can shift the emitted wavelength of the LED.

248 [Light monitoring](#)

249 Monitoring the exciting beam of light is of significant importance. In reality, not all LEDs are emitting  
250 exactly their advertised spectrum, and altering current can further shift their emitted spectrum (Fig 4  
251 B). However, regardless of the light source used, it is also necessary to be able to make LEDs of different  
252 wavelengths comparable. Most commercially available products measure light intensity in LUX or  
253 Lumen that are both weighted based on human perception. To avoid human bias, we initially measured  
254 all our LEDs irradiance and then used a simple script to calculate the emitted photons of each LED. In  
255 conjunction with altering current and utilizing neutral density filter combinations, we were able to  
256 reduce the emitted photons of each LED to comparable levels (Fig 4 A).

257

258 [Light Mixing](#)

259 Light conditions in different depth differ significantly depending on time, weather conditions, seasons,  
260 and phytoplankton activity. UV radiation is usually absorbed within the first few meters, while blue  
261 light reaches the furthest within the water column. Furthermore, colored dissolved organic matter has  
262 a strong influence on the spectral characteristics of the water column by absorbing UV and blue light  
263 (DeGrandpre et al., 1996). Similarly, dissolved organic matter absorbs mainly short wavelengths. The  
264 spectral composition of light in the water column conveys important spatial and temporal information  
265 as well as other environmental conditions. Many planktonic animals come equipped with extraocular  
266 photoreceptors or additional eyes with yet unknown function and spectral sensitivity (DREWES &  
267 FOURTNER, 2007; Ohtsu, 1983; Ramirez et al., 2011) or may be able to perceive different wavelengths  
268 in the same eye (color vision). To be able to simulate very different light conditions, we conceived a  
269 modular light path of 3D printed parts, LEDs as the light source, and different dichroic mirrors to be  
270 able to combine different LEDs (Fig 2). Coupled with a beam splitter and a spectrometer, it allows us  
271 to adjust and monitor the emitted spectrum finely and thus control the stimulating light on the  
272 animals.

273

## 274 Analysis Pipeline

### 275 TrackmateTaxis - tracking

276 The initial analysis pipeline starts with a Fiji (Schindelin et al., 2012) script that combines preprocessing  
277 of the videos as well as the tracking in a convenient way, Trackmatetaxis-tracking (Flowchart Fig 5,  
278 “Step-by-Step Guide” in supporting information). A GUI guides the user to all crucial steps and is  
279 capable of processing any number of videos autonomously. The image

TrackmateTaxis - Tracking

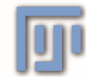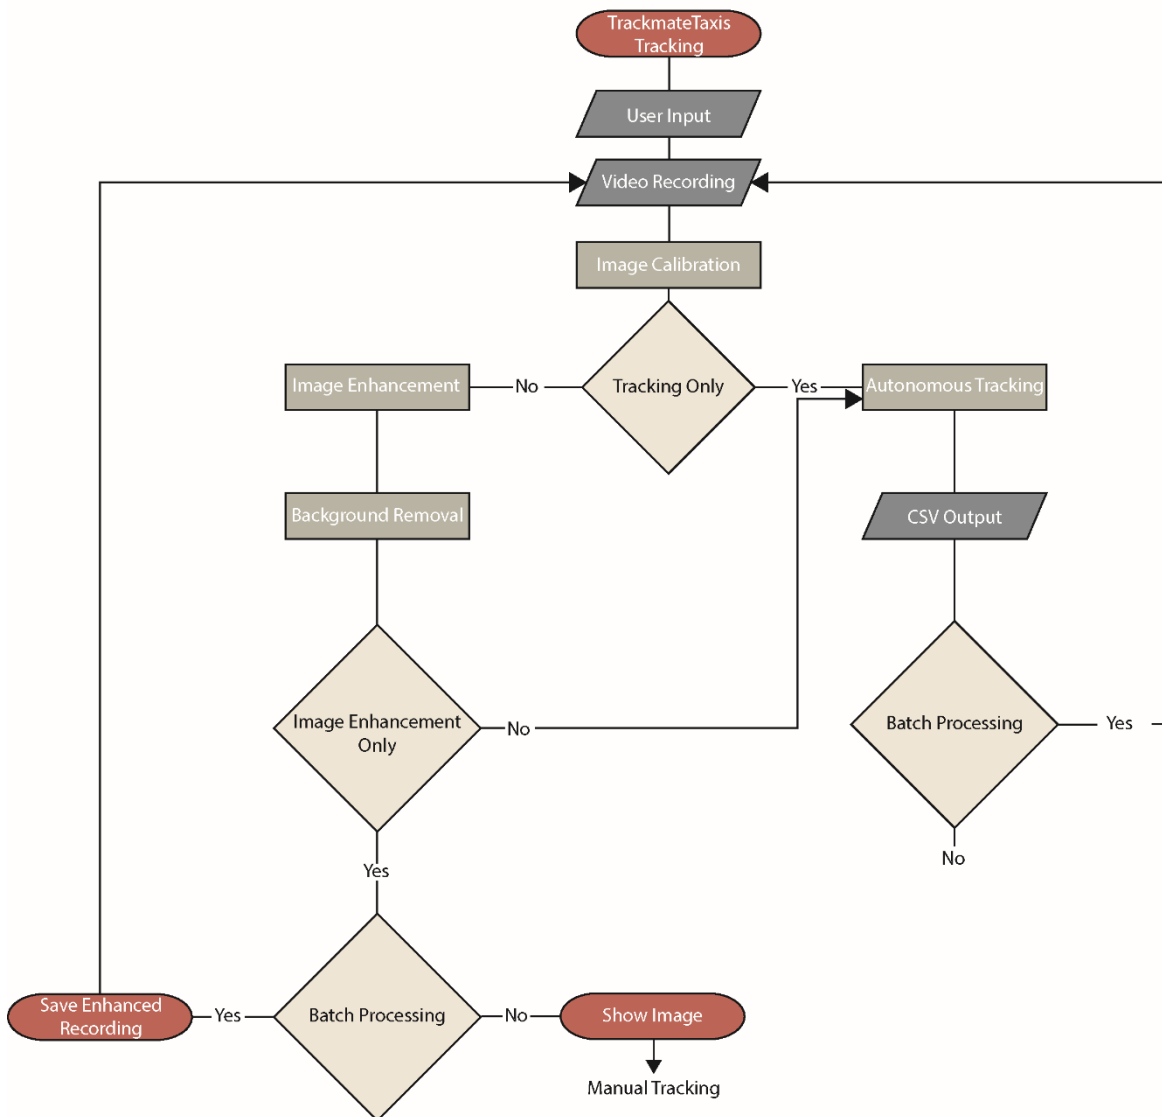

**Figure 5.** Flowchart of the software pipeline within Fiji. Diamonds are the decision by the user. Ovals denote beginning and ends. Rectangles are processing steps in the pipeline. A parallelogram depicts input and output. Initiating the trackmatetaxis script within Fiji will ask the user to specify working-directory and other parameters. The script fetches the avi-video files within the specified working directory and performs an image calibration. If the user decided to perform tracking only, all image enhancement steps are skipped, and the tracking with the plugin trackmate commences. If image enhancement has been chosen, the script will remove the background and increase the contrast to aid with the tracking. Usually, the script would pass the processed video to the tracker. If tracking is not desired, it will either save each file as a new video file or, if no batch processing has been chosen, will display the result directly within imageJ. This last step is supposed to aid in finding the best possible settings within Trackmate before the batch process can automatically work on all videos.

280 enhancements utilize build-in functions supplied by Fiji to calibrate the video, enhance contrast, and  
281 remove the background. The subsequent tracking utilizes Trackmate (Tinevez et al., 2017), a plugin  
282 originally designed for single-particle tracking. Trackers included in Trackmate fare well when it comes  
283 to identifying individual spots and even do well when spots are close to each other if settings have  
284 been adjusted to the animals. However, a significant problem of trackers is when two spots cross paths.  
285 Often the identity of spots can get lost during such events. Computer vision requires sophisticated  
286 algorithms to handle spots crossing over each other. To obtain statistically meaningful data sets in  
287 single recordings, we studied high numbers of animals and chose not to track the individuals over the  
288 entire duration. Instead, we recorded the cartesian coordinates of each detected spot, and only if the  
289 same spot was found in the next frame, we also let Trackmate calculate its velocity. If Trackmate is  
290 used via its own GUI, it will calculate all features of each spot and track. However, if it is executed using  
291 the provided script, the features that will be assessed are only those critical for subsequent analysis,  
292 and these are saved on disk as comma-separated values. This can save time when processing many  
293 recordings. The following analysis can work with files created either by the GUI of Trackmate or by the  
294 automatic script.

#### 295 [TrackmateTaxis – analyzing tracking data](#)

296 The analysis of the tracked data can be done by the provided custom python script Trackmatetaxis-  
297 analysis (“Step-by-Step Guide” in Supporting information). It makes use of the CSV files created by



298 Trackmate, has a GUI to ease usage, and is capable of processing many files autonomously. When  
299 starting a new experiment, the initial distribution of the animals in the cuvette may depend on many  
300 factors like gravity, chemical cues, pressure, swimming speed, or biorhythms. To make different  
301 experiments comparable, the script first calculates a baseline by averaging the tracked positions of all  
302 animals from frame “a” to “b” during the initial phase of the experiment. This baseline is subtracted  
303 from the median position  $\bar{x}_i$  of a given frame  $i$  to achieve the normalized median position:

$$304 \quad x_i^* : x_i^* = \bar{x}_i - \frac{1}{b-a} \sum_{j=a}^b \bar{x}_j$$

305

306 Furthermore, the script will also utilize the velocity information from the previous part of the pipeline  
307 to calculate the average speed of each frame. Velocity information can be particularly useful if the  
308 behavior of the animals is further impeded by chemical agents or other stimuli and can be used as a  
309 health indicator.

310 Similarly, the mean positions are calculated, and the script also adds 2%,9%,25%,50%,75%,91%, and  
311 98% quantiles as well as minimum and maximum positions for each frame. To account for natural  
312 fluctuations of the animal’s responses, also time-averaged values will be saved in a new file, and a  
313 user-specified time interval of interest will create respective boxplots.

314

### 315 [Example Data](#)

316 Two different animals were used with two different constellations of the setup. The annelid *M.*  
317 *fuliginosus* develops from pelagic planktotrophic larvae that remain within the water column for up to  
318 36 days (Blake & Arnofsky, 1999). For this experiment, animals of an early-stage were used, which were  
319 fertilized and kept until day seven at 18C in a day/night cycle of 18/6 hours. This experiment was used  
320 to test the effect of different wavelengths on the animals. For this purpose, different LEDs were  
321 installed above a cuvette containing around 300 *M. fuliginosus* larvae. Every LED used was down-

322 regulated to similar photon count emission with neutral density filters. Each recording started with 30  
323 seconds of darkness to calculate the baseline and was followed by 15 seconds of illumination with  
324 different LEDs. The final 45 seconds were again without any light stimulus. Each video afterward was  
325 manually cropped just to show the cuvette containing the animals. Afterward, the Fiji script for tracking  
326 was initiated. A single video was used to perform image enhancement and find appropriate values for  
327 the detection. These values were then used to enhance and track the animals in all the recordings.  
328 Finally, the tracking analysis script was used to extract all positional data on the y-axis from 40 seconds  
329 to 42 seconds (corresponding to frames 3014 to 3161 @ 73.5fps). The resulting boxplot shows the  
330 median distribution for the animals for each wavelength during the previously specified time interval  
331 (Fig 6). The 7-day-old larvae of

332 *Malacoceros* prefer light in the turquoise part of the  
333 visible spectrum, showing a clear peak at 505nm. The  
334 displacement tapers off towards the yellow and  
335 ultraviolet parts of the spectrum until no reaction is  
336 detectable.

337 The second animal was the cosmopolitan bryozoan  
338 *Tricellaria inopinata*. The larvae are spherical and  
339 roughly measure 200µm in diameter. In contrast to  
340 *Malacoceros*, these larvae are lecithotrophic and  
341 only remain in the water column for approximately  
342 24 hours. We transferred the larvae into a cuvette  
343 that had a UV LED of 355nm mounted underneath. The recording was a total of 54 seconds long with  
344 27 seconds of darkness (corresponds to 3000 frames at 54.21817 frames per second), in the beginning,  
345 followed by 15 seconds illumination with the UV LED.

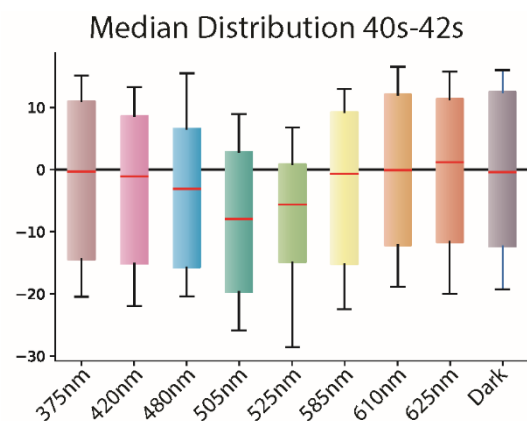

**Figure 6.** A boxplot showing the median distribution of the larvae of *Malacoceros fuliginosus* during illumination of different wavelengths. The animals show the greatest displacement towards the cyan wavelength.

346 The remaining time was again in darkness.  
347 The videos were cropped to show only the  
348 cuvette, and then the Fiji script was used  
349 to enhance the video and track all the  
350 animals. The tracking result was analyzed,  
351 and the mean and median distribution of  
352 animals during each frame was calculated.  
353 The resulting curve demonstrates the  
354 median (Fig 7 A) and mean (Fig 7 B)  
355 distribution of the animals over the entire  
356 video. The median distribution tracked a  
357 swift change towards the source of  
358 illumination, the 75<sup>th</sup> percentile reaches  
359 the edges of the vessel, and hence the  
360 displacement plateaus (Fig 7 A, arrow).

## 361 Discussion

362 Quantification and reproducibility are  
363 prerequisites for proper analysis of  
364 behavioral data, be it in the context of  
365 behavioral biology, sensory biology, or

366 ecology. In the case of macroscopic animals, observation and data analysis usually have to be adopted  
367 to a large extent to the specific research questions and the complexity of behavioral patterns observed.  
368 In the case of microscopic planktonic organisms, many questions can be addressed based on robust  
369 and comparable data on directed movements in the water column. We present an affordable and

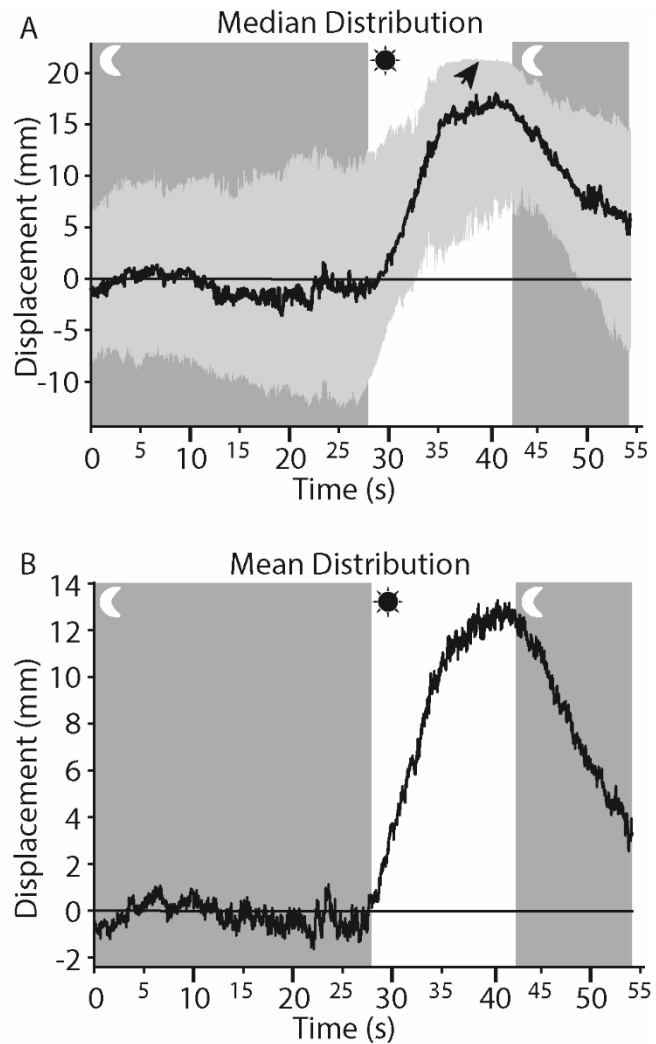

**Figure 7. A.** Median distribution of the larvae of *Tricellaria inopinata* showing their displacement towards a UV led over the entire duration of the recording. The light was turned on (white rectangle), and the animals started to swim towards the light source. Animals in the upper 75percentile hit the edge of the vessel, and the curve plateaus (arrow). **B.** The mean position of the same video as in **A.**

370 flexible experimental setup and an analysis pipeline, which can be used for this purpose and is  
371 applicable to study a wide range of organisms, irrespective of their specific swimming patterns.

372 With the help of 3D printing, our setup can easily be modified, extended, and adapted to more specific  
373 needs. The options are almost endless. The mounting options on our setup should allow the installation  
374 of many more add-ons like mechanical- or chemical stimuli. Furthermore, if 3D tracking is desirable, it  
375 would be possible to split the light path of one camera with a few 3D printed holders for mirrors, and  
376 the cuvette rotated by 45°. We hope that this setup with our analysis pipeline TrackmateTaxis will  
377 enable others also to conduct behavioral research on planktonic animals. All parts of this setup are  
378 designed with alterations in mind. It is not necessary to record videos with our setup to use our scripts  
379 and vice versa. As long as an avi-video is readable by Fiji, it can be processed. If a more advanced  
380 analysis is required, it is possible to either add to the existing script or use different ones. The  
381 behavioral spectrum of planktonic animals is as diverse as the animals itself and requires modular and  
382 flexible solutions that are easy to use and robust. This setup provides a solid foundation for future  
383 behavioral studies on a wide variety of planktonic animals.

## 384 Acknowledgments

385 We thank Suman Kumar (University of Bergen) for providing *M. fuliginosus* larvae for the experiments.  
386 Børge Hamre (University of Bergen) supplied the Ramses Spectrometer, which we much appreciate.

## 387 Authors contribution

388 CCD and HH designed the setup and the experiments. CCD created the 3D models, assembled the parts,  
389 wrote the software pipeline, and conducted the experiments. Both analyzed the data and wrote the  
390 manuscript. All authors gave final approval for the publication.

391

## 392 Data availability

393 Data sets, scripts, building instructions, and 3D models will be made available at the repositories  
394 listed in table 1. **Respective Dois will be provided upon submission of the accepted manuscript.**

| Data                              | Type of Data        | Storage location          | DOI |
|-----------------------------------|---------------------|---------------------------|-----|
| Behavioral Recordings of animals  | Video (avi)         | DataverseNO               |     |
| Raw Analysis Data                 | Excel and CSV files | DataverseNO               |     |
| ImageJ Plugin                     | Jython code         | Github and Zenodo Archive |     |
| Python Analysis                   | Python code         | Github and Zenodo Archive |     |
| Python SpectraRad to photon count | Python code         | Github and Zenodo Archive |     |
| 3D Models                         | FCStd & Obj         | DataverseNO               |     |

395 Table 1. Data availability for raw data, videos, and scripts.

## 396 References

- 397 Blake, J. A., & Arnofsky, P. L. (1999). Reproduction and larval development of the spioniform  
398 polychaete with application to systematics and phylogeny. *Hydrobiologia*, 402, 57–106.  
399 <https://doi.org/10.1023/A:1003784324125>
- 400 Branson, K., Robie, A. A., Bender, J., Perona, P., & Dickinson, M. H. (2009). High-throughput ethomics  
401 in large groups of *Drosophila*. *Nature Methods*, 6(6), 451–457.  
402 <https://doi.org/10.1038/nmeth.1328>
- 403 Crispim Junior, C. F., Pederiva, C. N., Bose, R. C., Garcia, V. A., Lino-de-Oliveira, C., & Marino-Neto, J.  
404 (2012). ETHOWATCHER: Validation of a tool for behavioral and video-tracking analysis in  
405 laboratory animals. *Computers in Biology and Medicine*, 42(2), 257–264.  
406 <https://doi.org/10.1016/j.combiomed.2011.12.002>
- 407 DeGrandpre, M. D., Vodacek, A., Nelson, R. K., Bruce, E. J., & Blough, N. V. (1996). Seasonal seawater  
408 optical properties of the U.S. Middle Atlantic Bight. *Journal of Geophysical Research: Oceans*,

- 409 101(C10), 22727–22736. <https://doi.org/10.1029/96JC01572>
- 410 DREWES, C. D., & FOURTNER, C. R. (2007). Hindsight and Rapid Escape in a Freshwater Oligochaete.  
411 *The Biological Bulletin*, 177(3), 363–371. <https://doi.org/10.2307/1541596>
- 412 Effertz, C., & von Elert, E. (2014). Light intensity controls anti-predator defences in *Daphnia*: the  
413 suppression of life-history changes. *Proceedings of the Royal Society B: Biological Sciences*,  
414 281(1782), 20133250–20133250. <https://doi.org/10.1098/rspb.2013.3250>
- 415 Elliott, G. R. D., MacDonald, T. A., & Leys, S. P. (2004). Sponge Larval Phototaxis: A Comparative  
416 Study. In *Bollettino dei Musei e degli Istituti Biologici* (Vol. 68).
- 417 Erkal, J. L., Selimovic, A., Gross, B. C., Lockwood, S. Y., Walton, E. L., McNamara, S., Martin, R. S., &  
418 Spence, D. M. (2014). 3D printed microfluidic devices with integrated versatile and reusable  
419 electrodes. *Lab Chip*, 14(12), 2023–2032. <https://doi.org/10.1039/C4LC00171K>
- 420 Fernö, A., Huse, I., Juell, J. E., & Bjordal, Å. (1995). Vertical distribution of Atlantic salmon (*Salmo*  
421 *solar* L.) in net pens: trade-off between surface light avoidance and food attraction.  
422 *Aquaculture*, 132(3–4), 285–296. [https://doi.org/10.1016/0044-8486\(94\)00384-Z](https://doi.org/10.1016/0044-8486(94)00384-Z)
- 423 Fields, D. M., & Yen, J. (1997). The escape behavior of marine copepods in response to a quantifiable  
424 fluid mechanical disturbance. *Journal of Plankton Research*, 19(9), 1289–1304.  
425 <https://doi.org/10.1093/plankt/19.9.1289>
- 426 Gal, G., Loew, E. R., Rudstam, L. G., & Mohammadian, a M. (1999). Light and diel vertical migration:  
427 spectral sensitivity and light avoidance by *Mysis relicta*. *Canadian Journal of Fisheries and*  
428 *Aquatic Sciences*, 56(1975), 311–322. <https://doi.org/2>
- 429 Gallagher, S. M., Yamazaki, H., & Davis, C. S. (2004). Contribution of fine-scale vertical structure and  
430 swimming behavior to formation of plankton layers on Georges Bank. *Marine Ecology Progress*  
431 *Series*, 267, 27–43. <https://doi.org/10.3354/meps267027>

- 432 Garm, A., O'Connor, M., Parkefelt, L., & Nilsson, D.-E. (2007). Visually guided obstacle avoidance in  
433 the box jellyfish *Tripedalia cystophora* and *Chiropsella bronzie*. *Journal of Experimental Biology*,  
434 *210*(20), 3616–3623. <https://doi.org/10.1242/jeb.004044>
- 435 Hart, A. (2006). Behavior. *WormBook*, 1–67. <https://doi.org/10.1895/wormbook.1.87.1>
- 436 Hays, G. C. (2003). A review of the adaptive significance and ecosystem consequences of zooplankton  
437 diel vertical migrations. *Hydrobiologia*, *503*, 163–170.  
438 <https://doi.org/10.1023/B:HYDR.0000008476.23617.b0>
- 439 Inger, R., Bennie, J., Davies, T. W., & Gaston, K. J. (2014). Potential biological and ecological effects of  
440 flickering artificial light. *PLoS ONE*, *9*(5). <https://doi.org/10.1371/journal.pone.0098631>
- 441 Jékely, G., Colombelli, J., Hausen, H., Guy, K., Stelzer, E., Nédélec, F., & Arendt, D. (2008). Mechanism  
442 of phototaxis in marine zooplankton. *Nature*, *456*(7220), 395–399.  
443 <https://doi.org/10.1038/nature07590>
- 444 Kiørboe, T. (2007). Mate finding, mating, and population dynamics in a planktonic copepod *Oithona*  
445 *davisae*: There are too few males. *Limnology and Oceanography*, *52*(4), 1511–1522.  
446 <https://doi.org/10.4319/lo.2007.52.4.1511>
- 447 Marsden, J. R. (1986). Response to light by trochophore larvae of *Spirobranchus giganteus*. *Marine*  
448 *Biology*, *93*(1), 13–16. <https://doi.org/10.1007/BF00428649>
- 449 Miller, S. E., & Hadfield, M. G. (1986). Ontogeny of phototaxis and metamorphic competence in  
450 larvae of the nudibranch *Phestilla sibogae* Bergh (Gastropoda : Opisthobranchia). *Journal of*  
451 *Experimental Marine Biology and Ecology*, *97*(1), 95–112. [https://doi.org/10.1016/0022-](https://doi.org/10.1016/0022-0981(86)90070-5)  
452 [0981\(86\)90070-5](https://doi.org/10.1016/0022-0981(86)90070-5)
- 453 Ohtsu, K. (1983). UV-visible antagonism in extraocular photosensitive neurons of the anthomedusa,  
454 *spirocodon saltatrix* (tilesius). *Journal of Neurobiology*, *14*(2), 145–155.  
455 <https://doi.org/10.1002/neu.480140206>

- 456 Oskarsson, M., Kjellberg, T., Palmér, T., Nilsson, D.-E., & Åström, K. (2015). Visual Tracking of Box  
457 Jellyfish. In *Computer Vision and Pattern Recognition in Environmental Informatics* (pp. 107–  
458 122). <https://doi.org/10.4018/978-1-4666-9435-4.ch006>
- 459 Pérez-Escudero, A., Vicente-Page, J., Hinz, R. C., Arganda, S., & De Polavieja, G. G. (2014). IdTracker:  
460 Tracking individuals in a group by automatic identification of unmarked animals. *Nature*  
461 *Methods*, 11(7), 743–748. <https://doi.org/10.1038/nmeth.2994>
- 462 Petie, R., Garm, A., & Nilsson, D.-E. (2011). Visual control of steering in the box jellyfish *Tripedalia*  
463 *cystophora*. *Journal of Experimental Biology*, 214(17), 2809–2815.  
464 <https://doi.org/10.1242/jeb.057190>
- 465 Piraino, S., Zega, G., Di Benedetto, C., Leone, A., Dell’Anna, A., Pennati, R., Candia Carnevali, D.,  
466 Schmid, V., & Reichert, H. (2011). Complex neural architecture in the diploblastic larva of *Clava*  
467 *multicornis* (Hydrozoa, Cnidaria). *The Journal of Comparative Neurology*, 519(10), 1931–1951.  
468 <https://doi.org/10.1002/cne.22614>
- 469 Ramirez, M. D., Speiser, D. I., Pankey, M. S., & Oakley, T. H. (2011). Understanding the dermal light  
470 sense in the context of integrative photoreceptor cell biology. *Visual Neuroscience*, 28(04), 265–  
471 279. <https://doi.org/10.1017/s0952523811000150>
- 472 Rawat, S., Komatsu, S., Markman, A., Anand, A., & Javidi, B. (2017). Compact and field-portable 3D  
473 printed shearing digital holographic microscope for automated cell identification. *Applied*  
474 *Optics*, 56(9), D127. <https://doi.org/10.1364/AO.56.00D127>
- 475 Ringelberg, J. (1964). The positively phototactic reaction of *daphnia magna* straus: A contribution to  
476 the understanding of diurnal vertical migration. *Netherlands Journal of Sea Research*, 2(3), 319–  
477 406. [https://doi.org/10.1016/0077-7579\(64\)90001-8](https://doi.org/10.1016/0077-7579(64)90001-8)
- 478 Rodríguez, Á., Bermúdez, M., Rabuñal, J. R., & Puertas, J. (2015). Fish tracking in vertical slot fishways  
479 using computer vision techniques. *Journal of Hydroinformatics*, 17(2), 275.



- 480 <https://doi.org/10.2166/hydro.2014.034>
- 481 Rodriguez, A., Zhang, H., Klaminder, J., Brodin, T., Andersson, P. L., & Andersson, M. (2017). ToxTrac:  
482 A fast and robust software for tracking organisms. *Methods in Ecology and Evolution*, 2018(July  
483 2017), 460–464. <https://doi.org/10.1111/2041-210X.12874>
- 484 Saberioon, M. M., & Cisar, P. (2016). Automated multiple fish tracking in three-Dimension using a  
485 Structured Light Sensor. *Computers and Electronics in Agriculture*, 121, 215–221.  
486 <https://doi.org/10.1016/j.compag.2015.12.014>
- 487 Samson, A. L., Ju, L., Kim, H. A., Zhang, S. R., Lee, J. A. A., Sturgeon, S. A., Sobey, C. G., Jackson, S. P., &  
488 Schoenwaelder, S. M. (2015). MouseMove: An open source program for semi-automated  
489 analysis of movement and cognitive testing in rodents. *Scientific Reports*, 5(May), 1–11.  
490 <https://doi.org/10.1038/srep16171>
- 491 Schindelin, J., Arganda-Carreras, I., Frise, E., Kaynig, V., Longair, M., Pietzsch, T., Preibisch, S., Rueden,  
492 C., Saalfeld, S., Schmid, B., Tinevez, J. Y., White, D. J., Hartenstein, V., Eliceiri, K., Tomancak, P., &  
493 Cardona, A. (2012). Fiji: An open-source platform for biological-image analysis. *Nature Methods*,  
494 9(7), 676–682. <https://doi.org/10.1038/nmeth.2019>
- 495 Swift, M. C., & Forward, R. B. (1980). Photoresponses of Chaoborus larvae. *Journal of Insect*  
496 *Physiology*, 26(6), 365–371. [https://doi.org/10.1016/0022-1910\(80\)90006-2](https://doi.org/10.1016/0022-1910(80)90006-2)
- 497 Symes, M. D., Kitson, P. J., Yan, J., Richmond, C. J., Cooper, G. J. T., Bowman, R. W., Vilbrandt, T., &  
498 Cronin, L. (2012). Integrated 3D-printed reactionware for chemical synthesis and analysis.  
499 *Nature Chemistry*, 4(5), 349–354. <https://doi.org/10.1038/nchem.1313>
- 500 Thorson, G. (1964). Light as an ecological factor in the dispersal and settlement of larvae of marine  
501 bottom invertebrates. *Ophelia*, 1(1), 167–208.  
502 <https://doi.org/10.1080/00785326.1964.10416277>
- 503 Tinevez, J. Y., Perry, N., Schindelin, J., Hoopes, G. M., Reynolds, G. D., Laplantine, E., Bednarek, S. Y.,

- 504 Shorte, S. L., & Eliceiri, K. W. (2017). TrackMate: An open and extensible platform for single-  
505 particle tracking. *Methods*, *115*, 80–90. <https://doi.org/10.1016/j.ymeth.2016.09.016>
- 506 Tranter, D. J., Bulleid, N. C., Campbell, R., Higgins, H. W., Rowe, F., Tranter, H. A., & Smith, D. F.  
507 (1981). Nocturnal movements of phototactic zooplankton in shallow waters. *Marine Biology*,  
508 *61*(4), 317–326. <https://doi.org/10.1007/BF00401571>
- 509 Veraszto, C., Guhmann, M., Jia, H., Rajan, V. B. V., Bezares-Calderon, L. A., Lopez, C. P., Randel, N.,  
510 Shahidi, R. R., Michiels, N. K., Yokoyama, S., Tessmar-Raible, K., Jékely, G., Verasztó, C.,  
511 Gühmann, M., Jia, H., Babu Veedin Rajan, V., Bezares-Calderón, L. A., Piñeiro Lopez, C., Randel,  
512 N., ... Jékely, G. (2018). Ciliary and rhabdomeric photoreceptor-cell circuits form a spectral  
513 depth gauge in marine zooplankton. *BioRxiv*, 1–26.  
514 <https://doi.org/10.1093/femsyr/foy001/4794945>
- 515 Xiang, Y., Yuan, Q., Vogt, N., Looger, L. L., Jan, L. Y., & Jan, Y. N. (2010). Light-avoidance-mediating  
516 photoreceptors tile the *Drosophila* larval body wall. *Nature*, *468*(7326), 921–926.  
517 <https://doi.org/10.1038/nature09576>
- 518
